# Supplementary material for: Resveratrol Decreases Oxidative Stress by Restoring Mitophagy and Improves the Pathophysiology of Dystrophin‐Deficient mdx Mice
Source: Hindawi journal article supplement (doi:10.1155/2018/9179270), 2018-01-01
Supplement: f1 [file 9179270.f1.pdf]

**Supplemental Figure 1.**

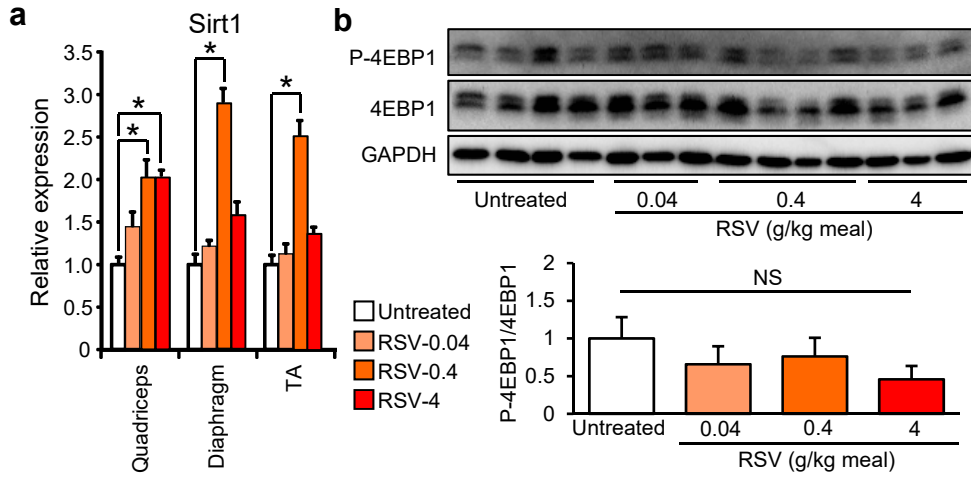

## Supplemental Figure 2.

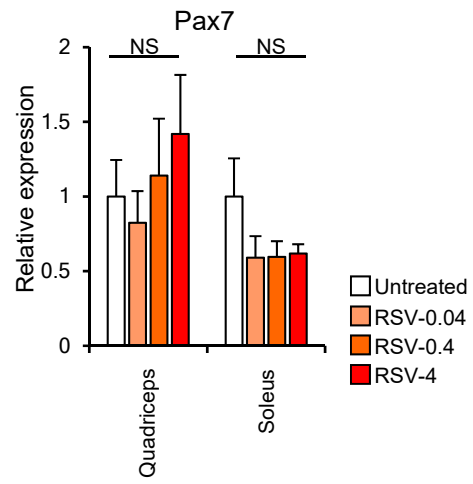

### Supplemental Figure 3.

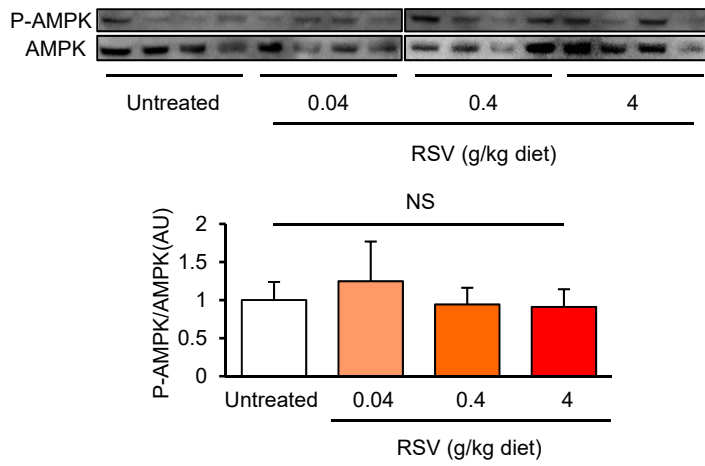

**Supplemental Table 1. Primer sequences for quantitative PCR.**

| <b>Gene</b>     | <b>Forward</b>              | <b>Reverse</b>                |
|-----------------|-----------------------------|-------------------------------|
| <b>Map1lc3b</b> | 5'-CGTCCTGGACAAGACCAAGT-3'  | 5'-ATTGCTGTCCCGAATGTCTC-3'    |
| <b>Bnip3</b>    | 5'-TCCACTAGCACCTTCTGATGA-3' | 5'-GAACACCGCATTACAGAACA-3'    |
| <b>Atg5</b>     | 5'-TTGGAACATCACAGTACATTT-3' | 5'-AACGAAATCCATTTTCTTCTG-3'   |
| <b>Becn1</b>    | 5'-CTGACAGACAAATCTAAGGAG    | 5'-AATAGGAGCCGCCACTGCCTC-3'   |
| <b>p62</b>      | 5'-CCTTGCCCTACAGCTGAGTC-3'  | 5'-CACACTCTCCCCACATTCT-3'     |
| <b>Pink1</b>    | 5'-TGAGGAGCAGACTCCCAGTT-3'  | 5'-AGTCCCCTCCACAAGGATG-3'     |
| <b>Parkin</b>   | 5'-TGGAAAGCTCCGAGTTCAGT-3'  | 5'-CCTTGTCTGAGGTTGGGTGT-3'    |
| <b>Lamp1</b>    | 5'-ACATCAGCCCAAATGACACA-3'  | 5'-GGCTAGAGCTGGCATTTCATC-3'   |
| <b>Tfeb</b>     | 5'-AACAGTGCTCCCAACAGTCC-3'  | 5'-GGCGCATAATGTTGTCAATG-3'    |
| <b>Fundc1</b>   | 5'-CCCCCTCCCAAGACTATGAA-3'  | 5'-CCACCCATTACAATCTGAGTAGC-3' |
| <b>Bcl2l13</b>  | 5'-CTCAGCCAGCAGTGACATA-3'   | 5'-GGCACCAAAGCTTATTCCA-3'     |
| <b>18s</b>      | 5'-CGGACAGGATTGACAGATTG-3'  | 5'-CAAATCGCTCCACCAACTAA-3'    |
| <b>Sirt1</b>    | 5'-GACGCTGTGGCAGATTGTTA-3'  | 5'-GGAATCCCACAGGAGACAGA-3'    |

**Supplemental Table 2. Antibodies used in the present study.**

| Antibody                                   | Source                    | Catalog number |
|--------------------------------------------|---------------------------|----------------|
| anti-LC3AB                                 | Cell Signaling Technology | 12741          |
| anti-phospho-Ser65-4EBP1                   | Cell Signaling Technology | 9451           |
| anti-total 4EBP1                           | Cell Signaling Technology | 9452           |
| anti-ubiquitin                             | Cell Signaling Technology | 3936           |
| anti-Phospho-AMPK $\alpha$ (Thr172) (40H9) | Cell Signaling Technology | 2535           |
| anti-AMPK $\alpha$ Antibody                | Cell Signaling Technology | 2532           |
| anti-p62                                   | Progen                    | GP62-C         |
| anti-GAPDH                                 | Sigma-Aldrich             | G8795          |
| anti- $\alpha$ -tubulin                    | Sigma-Aldrich             | T5168          |
